# Supplementary material
Source: Research Square preprint supplement (doi:10.21203/rs.3.rs-8904633/v1)
Supplement: Supplementary file 1 [file 6208ca126cda389449b44219.docx]

**Supplementary Table 1. List of the 27 side effects included in the weekly questionnaire, self-rated on a 4-point scale (0 = “Not at all”, 1 = “Sometimes”, 2 = “Often”, 3 = “All the time”).**

| **Number** | **Side Effect** |
| --- | --- |
| 1 | Appetite reduction |
| 2 | Weight loss |
| 3 | Weight gain |
| 4 | Stomach aches |
| 5 | Nausea |
| 6 | Vomiting |
| 7 | Diarrhea |
| 8 | Dryness (skin/ eyes/ mouth) |
| 9 | Thirst |
| 10 | Sore throat |
| 11 | Sleep difficulties |
| 12 | Tics |
| 13 | Headaches |
| 14 | Muscular tensions |
| 15 | Fatigue |
| 16 | Dizziness |
| 17 | Sweating |
| 18 | Agitation/excitability |
| 19 | Irritability |
| 20 | Mood instability |
| 21 | Over focus "zombie effect" |
| 22 | Sadness |
| 23 | Heart palpitations |
| 24 | Blood pressure changes (significantly lower or higher) |
| 25 | Frequent urination |
| 26 | Sexual dysfunction |
| 27 | Feeling worse or different when the medication wears off (rebound) |

**Supplementary Table 2. Summary of medication ingredients (derived from the 7 days prior to each weekly side-effect questionnaire).**

| **Medication Ingredient** | **Count** | **Percentage (%)** |
| --- | --- | --- |
| Methylphenidate ER | 2101 | 47.4 |
| Lisdexamfetamine | 1156 | 26.1 |
| Unknown | 360 | 8.1 |
| Methylphenidate (unspecified) | 346 | 7.8 |
| Mixed | 195 | 4.4 |
| Atomoxetine | 119 | 2.7 |
| Methylphenidate IR | 107 | 2.4 |
| Dexamfetamine | 50 | 1.1 |

Methylphenidate ER = Methylphenidate extended release; Methylphenidate IR = Methylphenidate immediate release; Mixed = more than one medication ingredient reported during the 7 days prior to each weekly side-effect questionnaire; Unknown = missing daily medication questionnaire data.

**Supplementary Table 3. Frequencies and proportions of side effects as reported in weekly side-effect questionnaires.**

| **Side Effect** | **0 Not at all** | **1 Sometime** | **2 Often** | **3 All the time** |
| --- | --- | --- | --- | --- |
| Appetite reduction | 1515 (34.17%) | 1873 (42.24%) | 703 (15.85%) | 343 (7.74%) |
| Weight loss | 2486 (56.07%) | 1604 (36.18%) | 264 (5.95%) | 80 (1.80%) |
| Weight gain | 3407 (76.84%) | 932 (21.02%) | 80 (1.80%) | 15 (0.34%) |
| Stomach aches | 3351 (75.58%) | 883 (19.91%) | 151 (3.41%) | 49 (1.11%) |
| Nausea | 3620 (81.64%) | 679 (15.31%) | 95 (2.14%) | 40 (0.90%) |
| Vomiting | 4261 (96.10%) | 146 (3.29%) | 11 (0.25%) | 16 (0.36%) |
| Diarrhea | 3551 (80.09%) | 733 (16.53%) | 129 (2.91%) | 21 (0.47%) |
| Dryness | 1555 (35.07%) | 1612 (36.36%) | 795 (17.93%) | 472 (10.65%) |
| Thirst | 1474 (33.24%) | 1605 (36.20%) | 924 (20.84%) | 431 (9.72%) |
| Sore throat | 3299 (74.40%) | 932 (21.02%) | 170 (3.83%) | 33 (0.74%) |
| Sleep difficulties | 1671 (37.69%) | 1751 (39.49%) | 664 (14.98%) | 348 (7.85%) |
| Tics | 3544 (79.93%) | 698 (15.74%) | 135 (3.04%) | 57 (1.29%) |
| Headaches | 2466 (55.62%) | 1551 (34.98%) | 363 (8.19%) | 54 (1.22%) |
| Muscular tensions | 2568 (57.92%) | 1383 (31.19%) | 383 (8.64%) | 100 (2.26%) |
| Fatigue | 2161 (48.74%) | 1534 (34.60%) | 527 (11.89%) | 212 (4.78%) |
| Dizziness | 3363 (75.85%) | 914 (20.61%) | 123 (2.77%) | 34 (0.77%) |
| Sweating | 2777 (62.63%) | 1071 (24.15%) | 406 (9.16%) | 180 (4.06%) |
| Agitation/excitability | 1953 (44.05%) | 1833 (41.34%) | 502 (11.32%) | 146 (3.29%) |
| Irritability | 2257 (50.90%) | 1690 (38.11%) | 361 (8.14%) | 126 (2.84%) |
| Mood instability | 2103 (47.43%) | 1611 (36.33%) | 527 (11.89%) | 193 (4.35%) |
| Over focus | 3213 (72.46%) | 1003 (22.62%) | 184 (4.15%) | 34 (0.77%) |
| Sadness | 2353 (53.07%) | 1518 (34.24%) | 424 (9.56%) | 139 (3.13%) |
| Heart palpitations | 3092 (69.73%) | 1075 (24.24%) | 216 (4.87%) | 51 (1.15%) |
| Blood pressure changes | 3790 (85.48%) | 528 (11.91%) | 92 (2.07%) | 24 (0.54%) |
| Frequent urination | 2448 (55.21%) | 1227 (27.67%) | 507 (11.43%) | 252 (5.68%) |
| Sexual dysfunction | 3197 (72.10%) | 772 (17.41%) | 275 (6.20%) | 190 (4.29%) |
| Rebound | 2525 (56.95%) | 1363 (30.74%) | 411 (9.27%) | 135 (3.04%) |

**Supplementary Table 4. Significant associations between self-reported side-effect severity and wearable-derived features estimated using linear mixed-effects models without multiple-comparison correction.**

| **Self-Reported Side Effect → Feature** | **Coef (SE)** | **P value** |
| --- | --- | --- |
| **Physiological feature** |  |  |
| Weight loss → Pulse rate | 0.305 (0.142) | 0.032 |
| Diarrhea → Respiratory rate | 0.189 (0.074) | 0.011 |
| Dryness → Pulse rate | 0.335 (0.117) | 0.004 |
| Dryness → Respiratory rate | 0.122 (0.049) | 0.013 |
| Thirst → Pulse rate | 0.298 (0.121) | 0.014 |
| Thirst → Respiratory rate | 0.168 (0.051) | 0.001 |
| Tics → Pulse rate | 0.499 (0.183) | 0.006 |
| Tics → Respiratory rate | 0.193 (0.077) | 0.012 |
| Headaches → Respiratory rate | 0.113 (0.057) | 0.049 |
| Muscular tensions → Pulse rate | 0.304 (0.143) | 0.033 |
| Sweating → Pulse rate | 0.549 (0.132) | <0.001 |
| Sweating → EDA | 0.301 (0.085) | <0.001 |
| Sweating → Respiratory rate | 0.224 (0.055) | <0.001 |
| Agitation/excitability → EDA | 0.303 (0.083) | <0.001 |
| Mood instability → Pulse rate | -0.254 (0.126) | 0.043 |
| Over focus → Pulse rate | 0.391 (0.168) | 0.02 |
| Sadness → Pulse rate | -0.288 (0.138) | 0.037 |
| Heart palpitations → EDA | 0.373 (0.101) | <0.001 |
| Blood pressure changes → EDA | 0.820 (0.138) | <0.001 |
| Blood pressure changes → Respiratory rate | 0.233 (0.085) | 0.006 |
| Frequent urination → Respiratory rate | 0.159 (0.058) | 0.007 |
| Sexual dysfunction → Pulse rate | 0.456 (0.179) | 0.011 |
| Sexual dysfunction → Respiratory rate | 0.175 (0.075) | 0.019 |
| Rebound → EDA | 0.221 (0.083) | 0.008 |
| **Physical Activity** |  |  |
| Dryness → Step count | 147.976 (56.129) | 0.008 |
| **Sleep timing and architecture** |  |  |
| Weight loss → Awakenings | -0.371 (0.174) | 0.032 |
| Weight gain → Sleep efficiency | -0.364 (0.176) | 0.039 |
| Weight gain → Sleep offset | 0.138 (0.058) | 0.018 |
| Stomach aches → Sleep onset | 0.111 (0.041) | 0.007 |
| Stomach aches → Sleep offset | 0.114 (0.050) | 0.023 |
| Vomiting → Total sleep time | 14.752 (4.523) | 0.001 |
| Vomiting → Sleep offset | 0.363 (0.116) | 0.002 |
| Diarrhea → Sleep efficiency | -0.649 (0.161) | <0.001 |
| Sleep difficulties → Sleep onset | 0.138 (0.028) | <0.001 |
| Sleep difficulties → Sleep offset | 0.124 (0.035) | <0.001 |
| Tics → Sleep offset | 0.116 (0.055) | 0.033 |
| Fatigue → Total sleep time | 3.161 (1.476) | 0.032 |
| Fatigue → Sleep offset | 0.116 (0.038) | 0.002 |
| Sweating → Awakenings | 0.480 (0.160) | 0.003 |
| Sweating → Sleep efficiency | -0.341 (0.119) | 0.004 |
| Agitation/excitability → Sleep onset latency | -0.462 (0.217) | 0.033 |
| Agitation/excitability → Sleep efficiency | 0.298 (0.115) | 0.009 |
| Irritability → Sleep onset | 0.069 (0.034) | 0.039 |
| Irritability → Sleep offset | 0.094 (0.041) | 0.023 |
| Mood instability → Sleep onset | 0.084 (0.031) | 0.007 |
| Mood instability → Sleep offset | 0.122 (0.038) | 0.001 |
| Over focus → Awakenings | -0.432 (0.207) | 0.037 |
| Over focus → Sleep onset | 0.136 (0.041) | 0.001 |
| Sadness → Sleep efficiency | 0.264 (0.126) | 0.036 |
| Sadness → Sleep onset | 0.132 (0.034) | <0.001 |
| Sadness → Sleep offset | 0.178 (0.042) | <0.001 |
| Blood pressure changes → Sleep onset | 0.119 (0.051) | 0.019 |
| Frequent urination → Total sleep time | -3.390 (1.609) | 0.035 |
| Sexual dysfunction → Awakenings | 0.797 (0.217) | <0.001 |
| Sexual dysfunction → Sleep offset | 0.154 (0.053) | 0.004 |
| Rebound → Sleep offset | 0.078 (0.039) | 0.047 |

**Supplementary Table 5. Associations of side-effect severity with additional medication ingredients not presented in Table 2.**

| **Side effect** | **Dexamfetamine** | | **Methylphenidate IR** | | **Methylphenidate** | | **Mixed** | | **Unknown** | |
| --- | --- | --- | --- | --- | --- | --- | --- | --- | --- | --- |
|  | Coef (SE) | FDR | Coef (SE) | FDR | Coef (SE) | FDR | Coef (SE) | FDR | Coef (SE) | FDR |
| Appetite reduction | -0.008 (0.108) | 0.94 | 0.024 (0.078) | 0.81 | 0.102 (0.064) | 0.23 | -0.107 (0.054) | 0.12 | 0.049 (0.048) | 0.41 |
| Weight loss | 0.199 (0.093) | 0.23 | -0.226 (0.067) | 0.02 | -0.197 (0.055) | 0.003 | -0.000 (0.047) | >0.99 | -0.155 (0.041) | 0.001 |
| Weight gain | 0.128 (0.069) | 0.23 | -0.018 (0.050) | 0.81 | 0.006 (0.040) | 0.95 | 0.100 (0.035) | 0.02 | -0.046 (0.030) | 0.23 |
| Stomach aches | 0.097 (0.077) | 0.4 | 0.168 (0.056) | 0.02 | 0.065 (0.045) | 0.27 | 0.038 (0.039) | 0.49 | 0.102 (0.034) | 0.01 |
| Nausea | 0.111 (0.071) | 0.29 | 0.065 (0.052) | 0.36 | 0.146 (0.042) | 0.003 | 0.040 (0.036) | 0.42 | 0.147 (0.032) | <0.001 |
| Vomiting | -0.003 (0.035) | 0.94 | 0.017 (0.025) | 0.68 | 0.139 (0.021) | <0.001 | 0.014 (0.018) | 0.6 | -0.001 (0.016) | 0.93 |
| Diarrhea | 0.035 (0.074) | 0.8 | 0.074 (0.054) | 0.3 | 0.115 (0.043) | 0.03 | 0.047 (0.038) | 0.37 | -0.003 (0.033) | 0.93 |
| Dryness | 0.059 (0.111) | 0.8 | -0.124 (0.080) | 0.27 | -0.201 (0.065) | 0.009 | 0.045 (0.055) | 0.6 | -0.341 (0.049) | <0.001 |
| Thirst | 0.108 (0.108) | 0.51 | -0.030 (0.078) | 0.81 | -0.063 (0.064) | 0.46 | 0.119 (0.054) | 0.08 | -0.159 (0.048) | 0.005 |
| Sore throat | 0.034 (0.075) | 0.8 | 0.105 (0.054) | 0.15 | 0.061 (0.044) | 0.28 | 0.128 (0.038) | 0.006 | 0.051 (0.033) | 0.23 |
| Sleep difficulties | 0.147 (0.113) | 0.4 | -0.197 (0.081) | 0.06 | -0.055 (0.066) | 0.55 | 0.283 (0.056) | <0.001 | -0.063 (0.050) | 0.33 |
| Tics | 0.037 (0.072) | 0.8 | 0.046 (0.052) | 0.56 | -0.083 (0.042) | 0.15 | 0.043 (0.036) | 0.38 | -0.088 (0.032) | 0.02 |
| Headaches | -0.029 (0.094) | 0.86 | 0.183 (0.068) | 0.04 | -0.017 (0.055) | 0.85 | -0.014 (0.047) | 0.84 | 0.032 (0.042) | 0.52 |
| Muscular tensions | -0.178 (0.091) | 0.23 | 0.167 (0.066) | 0.05 | -0.095 (0.054) | 0.18 | 0.080 (0.046) | 0.18 | -0.072 (0.040) | 0.16 |
| Fatigue | 0.185 (0.101) | 0.23 | 0.109 (0.073) | 0.28 | 0.069 (0.060) | 0.37 | 0.193 (0.051) | 0.002 | 0.050 (0.045) | 0.4 |
| Dizziness | 0.121 (0.074) | 0.28 | -0.019 (0.054) | 0.81 | -0.052 (0.043) | 0.37 | -0.018 (0.037) | 0.75 | 0.031 (0.033) | 0.44 |
| Sweating | -0.033 (0.098) | 0.86 | 0.187 (0.070) | 0.04 | 0.281 (0.058) | <0.001 | 0.139 (0.049) | 0.02 | -0.091 (0.043) | 0.09 |
| Agitation/excitability | -0.023 (0.104) | 0.89 | -0.127 (0.075) | 0.22 | -0.155 (0.061) | 0.04 | -0.068 (0.052) | 0.37 | -0.111 (0.046) | 0.05 |
| Irritability | 0.185 (0.095) | 0.23 | 0.150 (0.068) | 0.09 | -0.103 (0.056) | 0.17 | 0.129 (0.048) | 0.03 | -0.038 (0.042) | 0.44 |
| Mood instability | 0.212 (0.104) | 0.23 | 0.014 (0.075) | 0.88 | -0.097 (0.061) | 0.23 | 0.124 (0.052) | 0.06 | -0.031 (0.046) | 0.57 |
| Over focus | -0.160 (0.077) | 0.23 | 0.082 (0.056) | 0.28 | 0.003 (0.045) | 0.95 | -0.065 (0.039) | 0.19 | -0.036 (0.034) | 0.41 |
| Sadness | 0.156 (0.095) | 0.28 | 0.063 (0.068) | 0.56 | -0.183 (0.056) | 0.006 | 0.146 (0.047) | 0.01 | -0.095 (0.042) | 0.06 |
| Heart palpitations | 0.128 (0.089) | 0.34 | -0.035 (0.064) | 0.76 | 0.019 (0.052) | 0.85 | -0.003 (0.045) | 0.98 | -0.089 (0.039) | 0.06 |
| Blood pressure changes | 0.067 (0.064) | 0.51 | -0.140 (0.047) | 0.02 | 0.055 (0.038) | 0.27 | 0.020 (0.033) | 0.69 | -0.037 (0.029) | 0.33 |
| Frequent urination | 0.055 (0.095) | 0.8 | 0.048 (0.068) | 0.68 | 0.042 (0.056) | 0.59 | -0.026 (0.047) | 0.72 | -0.151 (0.042) | 0.002 |
| Sexual dysfunction | 0.074 (0.075) | 0.51 | 0.008 (0.054) | 0.89 | -0.005 (0.044) | 0.95 | 0.074 (0.075) | 0.51 | -0.004 (0.033) | 0.93 |
| Rebound | 0.198 (0.100) | 0.23 | 0.150 (0.072) | 0.11 | -0.019 (0.059) | 0.85 | 0.198 (0.100) | 0.23 | -0.091 (0.044) | 0.09 |

Methylphenidate IR = Methylphenidate immediate release; Mixed = more than one medication ingredient reported during the 7 days prior to each weekly side-effect questionnaire; Unknown = missing daily medication questionnaire data.

**Supplementary Figure 1. Distribution of weekly side-effect questionnaires completed per participant. Only questionnaires from weeks with reported medication use are included.**


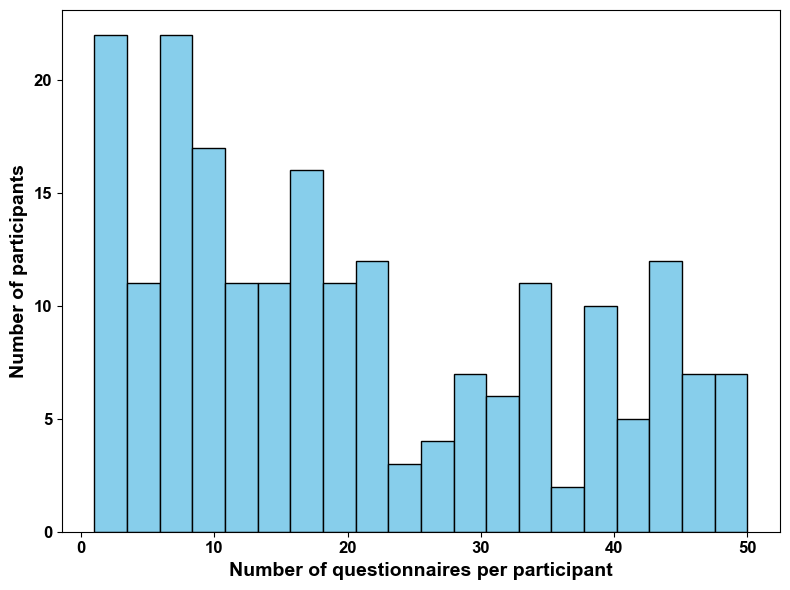


**Supplementary Figure 2. Proportions of reported side effects over time (week 1–20).**

**
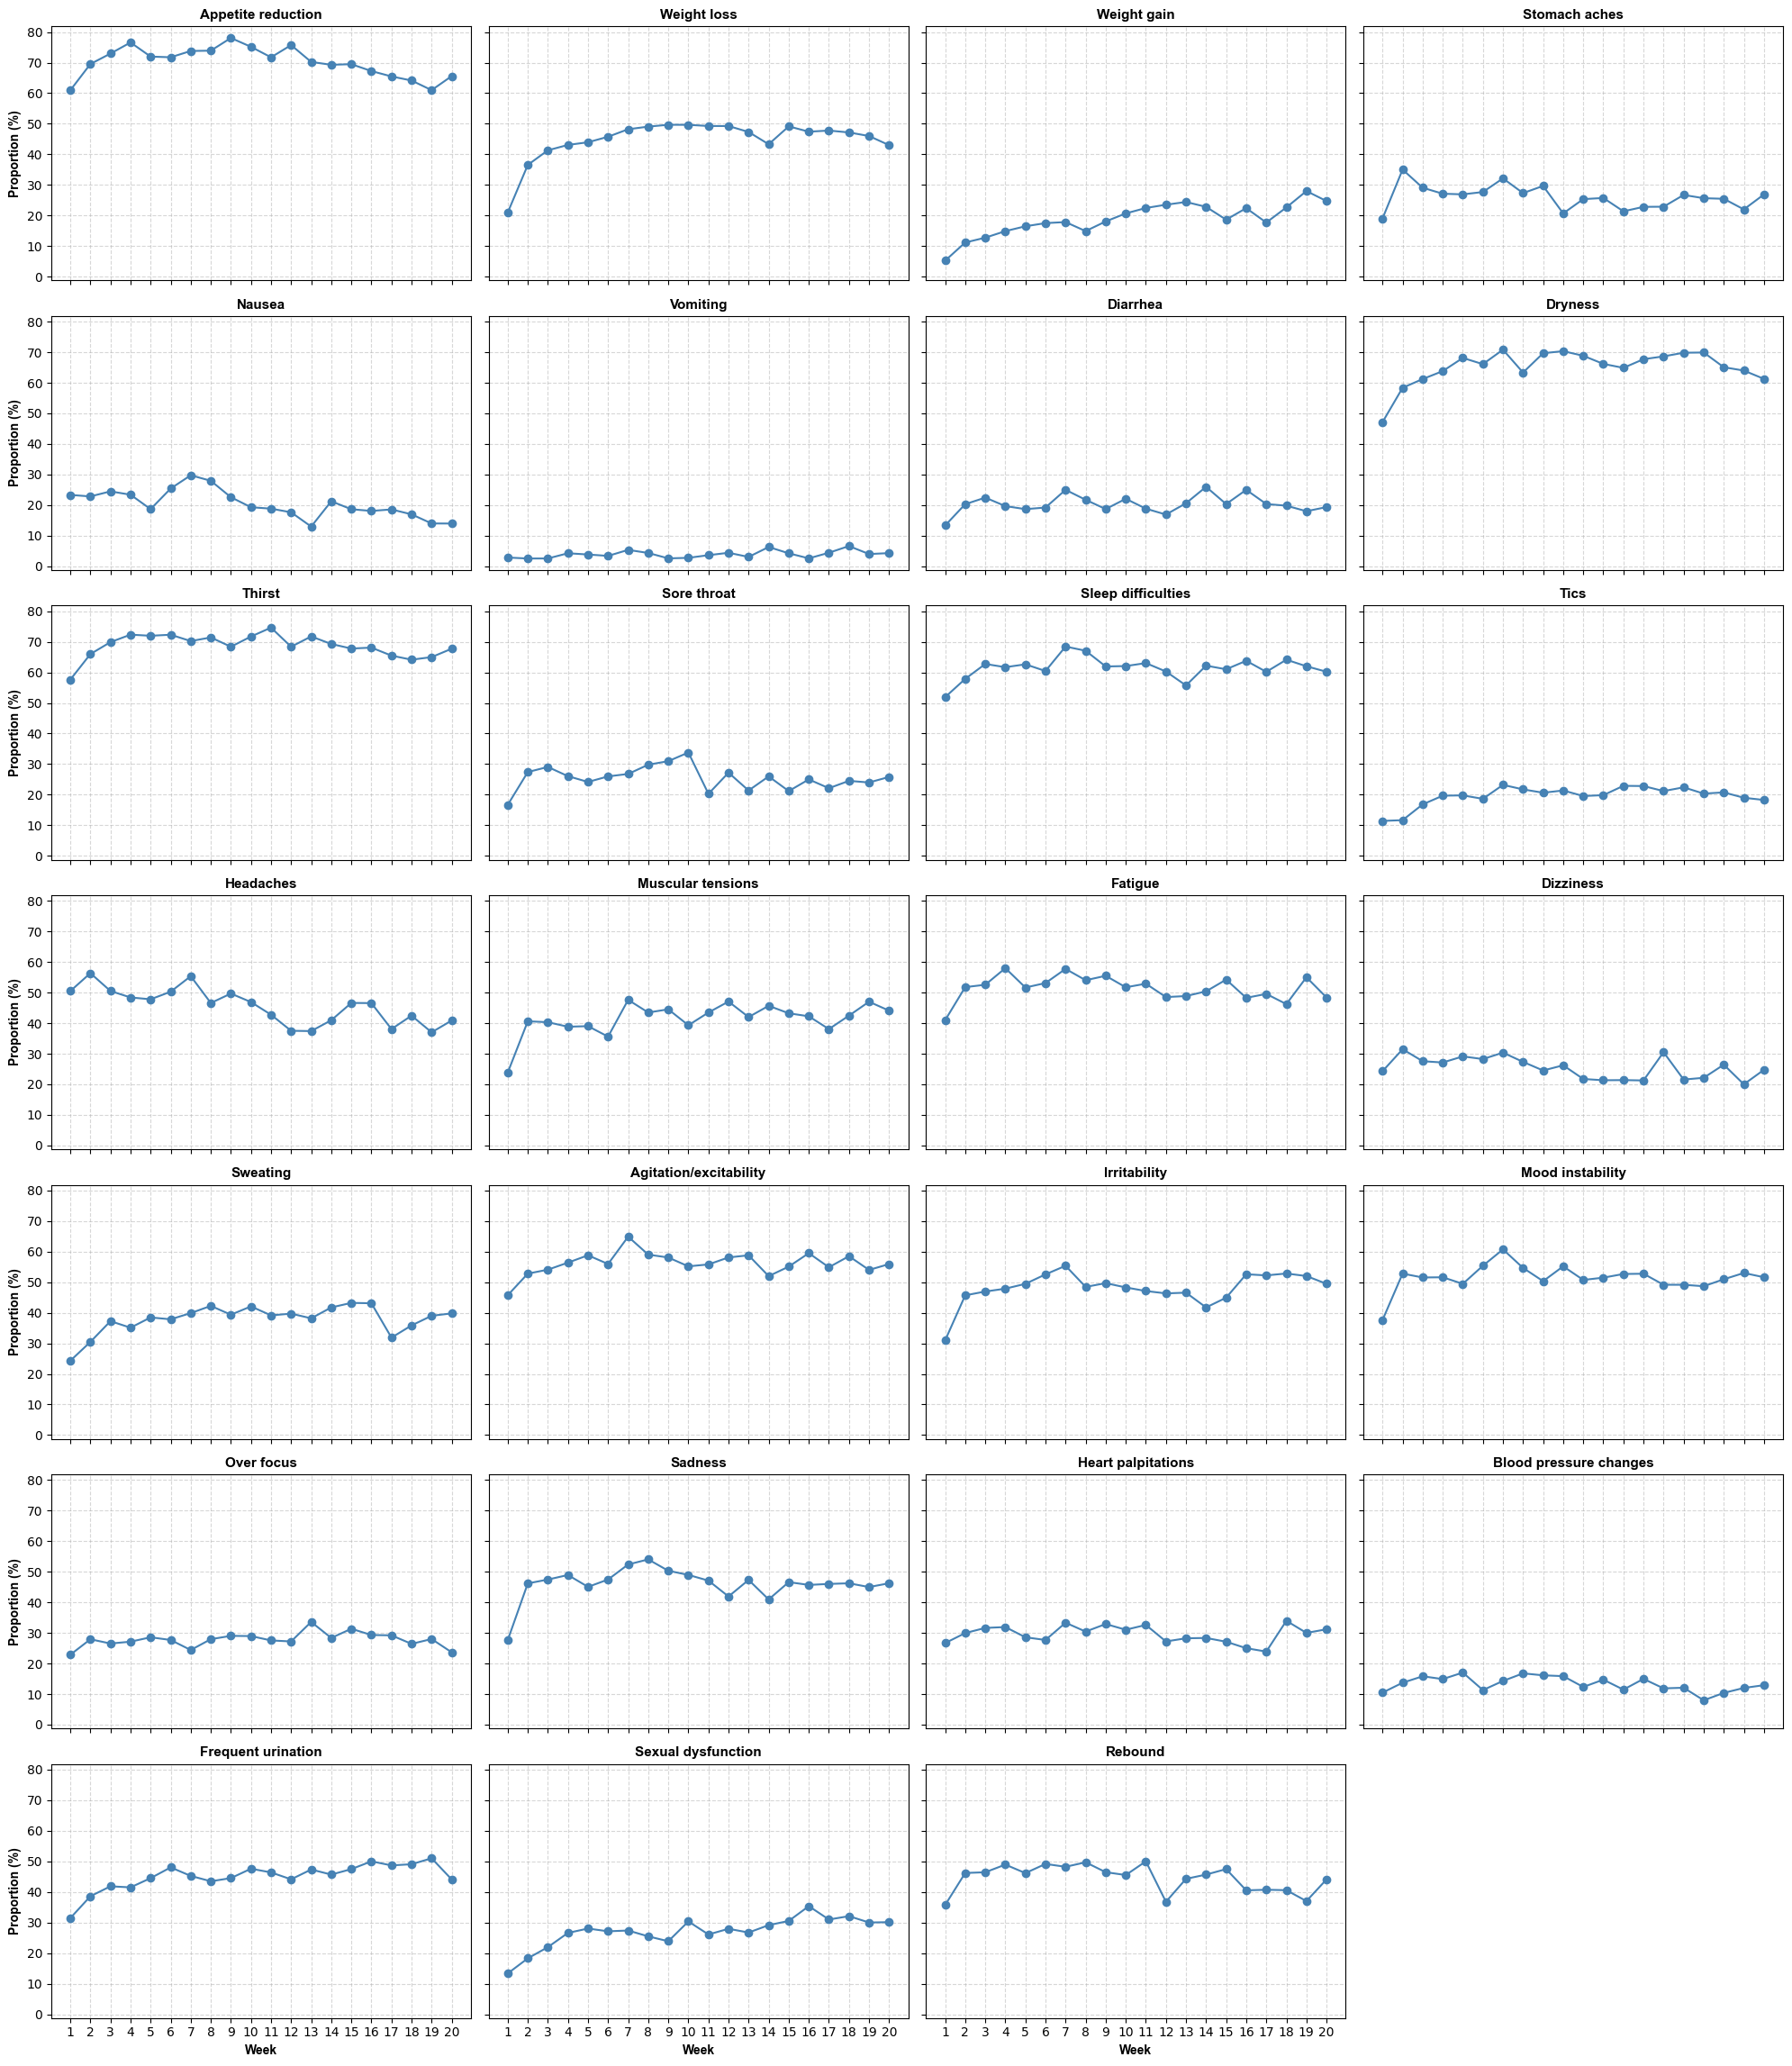
**
